# Supplementary material for: Pseudogenization of the rhizobium-responsive EXOPOLYSACCHARIDE RECEPTOR in Parasponia is a rare event in nodulating plants
Source: BMC Plant Biol. 2022 Apr 30;22:225. doi: 10.1186/s12870-022-03606-9 (PMC9055685; doi:10.1186/s12870-022-03606-9)
Supplement: Supplementary file 1 — Additional file 1: Table S1. Gene structure of LjEPR3/MtLYK10 orthologs in nodulating plants. Exon lengths indicated in green have been manually curated based on alignment with close homologs. Note: Trema spp. represent non-nodulating species. [file 12870_2022_3606_MOESM1_ESM.xlsx]

## Sheet: Blad1
Table S1: Gene structure of LjEPR3/MtLYK10 orthologs in nodulating plants. Exon lengths indicated in green have been manually curated based on alignment with close homologs. Note: Trema spp represent non-nodulating species.
species	order, (sub)family	gene name / i.d.	exon1	exon2	exon3	exon4	exon5	exon6	exon7	exon8	exon9	exon10
Datisca glomerata	Cucurbitales, Datiscaceae	Datgl1333S01924	649	207	140	90	106	152	98	139	99	165
Alnus glutinosa	Fagales, Betulaceae	Alngl25086S21770	757	201	140	90	106	152	98	139	99		last exon not present in contig
Casuarina equisetifolia	Fagales, Casuarinaceae	CCG006197.1	607	201	131	90	106	152	98	139	99	165
Casuarina glauca	Fagales, Casuarinaceae	Casgl955S23425	607	201	131	90	106	152	98	139	99	165
Purshia tridentata	Rosales, Rosaceae	QANT01001053.1	652	201	131	90	106	152	98	139	99	165
Dryas drummondii	Rosales, Rosaceae	Dryas drummondii EPR	652	201	131	90	106	152	98	139	99	165
Discaria trinervis	Rosales, Rhamnaceae	Distr1293S13435	655	204	131	90	106	152	98	139	99	165
Parasponia andersonii	Rosales, Cannabaceae	Panepr	649	204	131	90	106	152	98	139	99	165
Trema orientalis	Rosales, Cannabaceae	TorEPR	649	204	131	90	106	152	98	139	99	165
Trema tomentosa	Rosales, Cannabaceae	TtoEPRa	661	204	131	90	106	152	98	139	99	165
Chamaecrista fasciculata	Fabales, Fabaceae, Caesalpinioideae	Chafa3673S21651	658	222	140	90	106	152	98	139	99	165	9 bp intron 3 with non-canonical acceptor splice stie (GTAATTCAA), when not spliced in-frame insertion of 3AA
Mimosa pudica	Fabales, Fabaceae, Caesalpinioideae	Mimpu35782S22845	652	234	134	90	106	152	98	139	99	165
Prosopis alba	Fabales, Fabaceae, Caesalpinioideae	LOC114713972	652	231	134	90	106	152	98	139	99	165
Lotus japonicus	Fabales, Fabaceae, Papilionoideae	Lj0g3v0307069	640	207	140	90	106	152	98	139	99	165
Spatholobus suberectus	Fabales, Fabaceae, Papilionoideae	TKY58681	670	204	140	90	106	152	98	139	99	165
Glycine soja	Fabales, Fabaceae, Papilionoideae	Glysoja.08G021937	661	210	140	90	106	152	98	139	99	165
Glycine max	Fabales, Fabaceae, Papilionoideae	Glyma08G283300	715	207	140	90	106	152	98	139	99	165
Macrotyloma uniflorum	Fabales, Fabaceae, Papilionoideae	Mun_sc0009.1_g04510	655	204	140	90	106	152	98	139	99	165
Phaseolus vulgaris	Fabales, Fabaceae, Papilionoideae	PhvuI.003G063700	655	204	140	90	106	152	98	139	99	165
Vigna unguiculata	Fabales, Fabaceae, Papilionoideae	Vigun03g232900	652	204	140	90	106	152	98	139	99	165
Vigna radiata	Fabales, Fabaceae, Papilionoideae	LOC106780768	706	204	140	90	106	152	98	139	99	165
Aeschynomene evenia	Fabales, Fabaceae, Papilionoideae	Ae03G06000	655	207	140	90	106	152	98	142	99	165
Arachis duranensis	Fabales, Fabaceae, Papilionoideae	Aradu.J0SGA	583	207	140	90	106	152	98	142		264	merged exon 9-10
Arachis hypogaea	Fabales, Fabaceae, Papilionoideae	arahy.REE5L6.1	673	207	140	90	106	152	98	142		264	merged exon 9-10
Arachis monticola	Fabales, Fabaceae, Papilionoideae	aramo.EVM0074906.1	583	207	140	90	106	152	98	142		264	merged exon 9-10
Arachis monticola	Fabales, Fabaceae, Papilionoideae	aramo.EVM0027952.1	583	207	140	90	106	152	98	142		264	merged exon 9-10
Arachis monticola	Fabales, Fabaceae, Papilionoideae	aramo.EVM0023968.1	606	207	140	90	106	152	98	142		264	merged exon 9-10
Arachis hypogaea	Fabales, Fabaceae, Papilionoideae	P7CPN3	673	207	140	90	106	152	98	142		264	merged exon 9-10
Arachis ipaensis	Fabales, Fabaceae, Papilionoideae	Araip.19T2H	583	207	140	90	106	152	98	142		264	merged exon 9-10
Arachis hypogaea	Fabales, Fabaceae, Papilionoideae	7J5ZWH	694	192	140	90	258		98	139	99	165	merged exon 5-6
Arachis ipaensis	Fabales, Fabaceae, Papilionoideae	Araip.IX7QU	694	192	140	90	258		98	139	99	165	merged exon 5-6
Arachis hypogaea	Fabales, Fabaceae, Papilionoideae	6V1TUE	694	192	140	90	258		98	139	99	165	merged exon 5-6
Arachis duranensis	Fabales, Fabaceae, Papilionoideae	Aradu.R7N81	694	192	140	90	258		98	139	99	165	merged exon 5-6
Lupinus angustifolius	Fabales, Fabaceae, Papilionoideae	Lup020722	421	201	131	90	106	152	98	139	99	165	partial sequence exon1 due to gap
Lotus japonicus	Fabales, Fabaceae, Papilionoideae	LjEPR3 / LjLYS3	670	204	140	90	106	152	98	139	99	165
Cicer arietinum	Fabales, Fabaceae, Papilionoideae	Ca_18141.v1.0.492	649	204	140	90	106	152	98	139	99	165
Medicago truncatula	Fabales, Fabaceae, Papilionoideae	MtLYK10 / Medtr5g033490	649	204	140	90	106	152	98	139	99	165
Trifolium pratense	Fabales, Fabaceae, Papilionoideae	Tp57577_TAGC_v2_gene38785	655	204	140	90	106	152	98	139	99	165
Vicia sativa	Fabales, Fabaceae, Papilionoideae	VsEPR3	655	204	140	90	106	152	98	139	99	165
Pisum sativum	Fabales, Fabaceae, Papilionoideae	Pissat_chr2LG1,	667	204	140	90	106	152	98	139	99	165
Abrus precatorius	Fabales, Fabaceae, Papilionoideae	LOC113869898	655	210	140	90	106	152	98	139	99	162
Spatholobus suberectus	Fabales, Fabaceae, Papilionoideae	TKY69902.1	649	210	140	90	106	152	98	139	99	165
Mucuna pruriens	Fabales, Fabaceae, Papilionoideae	Mucpru_RDX80786.1	649	210	140	90	106	152	98	139	99	165
Glycine soja	Fabales, Fabaceae, Papilionoideae	Glysoja.01G000269	715	207	140	90	106	152	98	139	99	165
Glycine max	Fabales, Fabaceae, Papilionoideae	Glyma01G027100	661	210	140	90	106	152	98	139	99	165
Phaseolus vulgaris	Fabales, Fabaceae, Papilionoideae	PhvuI.002G059500	670	204	137	90	106	152	98	139	99	165
Vigna unguiculata	Fabales, Fabaceae, Papilionoideae	Vigun02g080500	667	204	140	90	106	152	98	139	99	165
Vigna radiata	Fabales, Fabaceae, Papilionoideae	LOC106777404	649	198	140	90	106	152	98	139	99	165
Vigna angularis	Fabales, Fabaceae, Papilionoideae	LOC108328851	655	198	140	90	106	152	98	139	99	165
